# Supplementary material for: Independent infections of porcine deltacoronavirus among Haitian children
Source: PubMed Central journal article supplement (PMC8636265; doi:10.1038/s41586-021-04111-z), 2021-11-17
Supplement: 41586_2021_4111_MOESM1_ESM.pdf [file 41586_2021_4111_MOESM1_ESM.pdf]

**Supplementary information**

---

**Independent infections of porcine  
deltacoronavirus among Haitian children**

---

In the format provided by the  
authors and unedited

| <b>NCBI Accession Number</b> | <b>Country of Origin</b> |
|------------------------------|--------------------------|
| JQ065042                     | China                    |
| JQ065043                     | China                    |
| KJ481931                     | USA                      |
| KJ567050                     | USA                      |
| KJ584355                     | USA                      |
| KJ584356                     | USA                      |
| KJ584357                     | USA                      |
| KJ584358                     | USA                      |
| KJ584359                     | USA                      |
| KJ620016                     | USA                      |
| KM820765                     | SouthKorea               |
| KP757890                     | China                    |
| KP757891                     | China                    |
| KP757892                     | China                    |
| KR131621                     | China                    |
| KR150443                     | USA                      |
| KR265847                     | USA                      |
| KR265848                     | USA                      |
| KR265849                     | USA                      |
| KR265850                     | USA                      |
| KR265851                     | USA                      |
| KR265852                     | USA                      |
| KR265853                     | USA                      |
| KR265854                     | USA                      |
| KR265855                     | USA                      |
| KR265856                     | USA                      |
| KR265857                     | USA                      |
| KR265858                     | USA                      |
| KR265859                     | USA                      |
| KR265860                     | USA                      |
| KR265861                     | USA                      |
| KR265862                     | USA                      |
| KR265863                     | USA                      |
| KR265864                     | USA                      |
| KR265865                     | USA                      |
| KT021234                     | China                    |
| KT266822                     | China                    |
| KT336560                     | China                    |
| KT381613                     | USA                      |
| KU051641                     | Thailand                 |
| KU051649                     | Thailand                 |
| KU981059                     | China                    |
| KU984334                     | Thailand                 |
| KX022602                     | USA                      |

|          |            |
|----------|------------|
| KX022603 | USA        |
| KX022604 | USA        |
| KX022605 | USA        |
| KX118627 | Laos       |
| KX361343 | Thailand   |
| KX361344 | Thailand   |
| KX361345 | Thailand   |
| KX834351 | Vietnam    |
| KX834352 | Vietnam    |
| KX998969 | Vietnam    |
| KY065120 | China      |
| KY293677 | China      |
| KY293678 | China      |
| KY354363 | SouthKorea |
| KY354364 | SouthKorea |
| KY363867 | China      |
| KY363868 | China      |
| KY513724 | China      |
| KY513725 | China      |
| KY926512 | SouthKorea |
| LC260038 | Japan      |
| LC260039 | Japan      |
| LC260040 | Japan      |
| LC260041 | Japan      |
| LC260042 | Japan      |
| LC260043 | Japan      |
| LC260044 | Japan      |
| LC260045 | Japan      |
| MF041982 | China      |
| MF095123 | China      |
| MF280390 | China      |
| MF431742 | China      |
| MF431743 | China      |
| MF642322 | China      |
| MF642323 | China      |
| MF642324 | China      |
| MF642325 | China      |
| MF948005 | China      |
| MG242062 | China      |
| MG812375 | USA        |
| MG812376 | USA        |
| MG812377 | USA        |
| MG812378 | USA        |
| MG832584 | China      |
| MG837130 | SouthKorea |

|          |            |
|----------|------------|
| MG837131 | SouthKorea |
| MH025762 | China      |
| MH025763 | China      |
| MH025764 | China      |
| MH708123 | China      |
| MH708124 | China      |
| MH708125 | China      |
| MH715491 | China      |
| MK005882 | China      |
| MK211169 | China      |
| MK330604 | China      |
| MK330605 | China      |
| MK355396 | China      |
| MK359104 | China      |
| MK572803 | China      |
| MK993519 | China      |
| MN025260 | China      |
| MN249445 | China      |
| MN942260 | China      |

---
